# Supplementary material
Source: publisher figshare collection journal article supplement (https://gsajournals.figshare.com/ndownloader/files/21214977)
Supplement: Supplementary file 1 [file 21214977]

Table S7. Lead QTL in F34 GBS and F34 array GWAS studies across phenotypes. Significant SNPs are clumped using parameters r2=0.1, 12150kb.																			Note
Phenotype detail	CHR	F34 GBS									F34 Array
		SNP	BP	P	allele1	allele0	af	beta	se		SNP	BP	P	allele1	allele0	af	beta	se
Body weight	4	chr4.66414508	66414508	8.58E-08	T	C	0.42	-0.25	0.05		chr4.65246120	65246120	9.06E-08	A	G	0.57	0.25	0.05
	6	chr6.81405109	81405109	6.22E-06	T	C	0.5	0.21	0.05										Array SNPs just below significance threshold
	14	chr14.79312393	79312393	7.45E-06	T	C	0.51	-0.2	0.04		chr14.78926547	78926547	6.24E-06	C	T	0.47	0.21	0.05
Routine CBC hemoglobin distribution width	4	chr4.59202210	59202210	2.47E-08	G	A	0.56	0.33	0.06		chr4.62188670	62188670	7.11E-08	A	C	0.6	0.34	0.06
	12										chr12.31468914	31468914	1.16E-05	C	T	0.26	-0.3	0.07	GBS SNPs just below significance threshold
	16	chr16.70311614	70311614	1.30E-06	C	T	0.53	-0.31	0.06		chr16.70166221	70166221	3.86E-06	C	T	0.48	0.29	0.06
Routine CBC mean platelet volume	9	chr9.39536487	39536487	7.51E-06	A	T	0.47	0.24	0.05										GBS SNPs captured the small LD, while array SNPs did not
	12	chr12.72086995	72086995	1.27E-05	G	A	0.34	-0.27	0.06		chr12.72342885	72342885	1.23E-05	C	T	0.34	-0.28	0.06
Routine WBC differential white blood cell count	7	chr7.87866323	87866323	7.94E-06	A	C	0.57	-0.34	0.08		chr7.81902543	81902543	1.62E-05	A	G	0.53	-0.32	0.07
	7	chr7.104507724	104507724	6.84E-06	T	A	0.56	0.31	0.07										Array SNPs just below significance threshold
	19	chr19.21895174	21895174	1.88E-06	C	A	0.52	-0.35	0.07		chr19.21478738	21478738	1.50E-05	C	T	0.47	0.31	0.07
Routine WBC differential lymphocyte number	1	chr1.131278325	131278325	5.76E-06	T	C	0.5	0.28	0.06										Array SNP just below significance threshold
	7	chr7.84006790	84006790	2.56E-08	G	A	0.46	0.4	0.07		chr7.81902543	81902543	3.76E-08	A	G	0.53	-0.4	0.07
	14	chr14.59201574	59201574	1.37E-05	G	A	0.72	-0.31	0.07										Array SNP just below significance threshold
	19	chr19.21588528	21588528	7.07E-06	A	G	0.45	0.3	0.07										Array SNP just below significance threshold
Routine WBC differential monocyte percentage	10	chr10.20463366	20463366	1.04E-06	G	A	0.38	-0.34	0.07		chr10.20023766	20023766	1.99E-05	C	T	0.38	-0.3	0.07
	12	chr12.79745604	79745604	4.20E-06	G	A	0.55	-0.3	0.06		chr12.79613031	79613031	1.48E-05	C	T	0.45	0.28	0.06
	14	chr14.77678929	77678929	3.88E-06	G	T	0.5	-0.31	0.07		chr14.77673987	77673987	1.06E-05	A	G	0.5	0.3	0.07
Routine WBC differential white blood cell count	7	chr7.87866323	87866323	3.40E-06	A	C	0.57	-0.35	0.08		chr7.81902543	81902543	9.83E-06	A	G	0.53	-0.33	0.07
	7	chr7.104507724	104507724	1.03E-05	T	A	0.56	0.31	0.07										Array SNP just below significance threshold
	19	chr19.21895174	21895174	2.59E-06	C	A	0.52	-0.35	0.07		chr19.21478738	21478738	1.93E-05	C	T	0.47	0.31	0.07
Routine WBC differential eosinophil percentage	1	chr1.127361186	127361186	2.85E-06	T	C	0.56	-0.32	0.07		chr1.126874126	126874126	4.61E-06	G	T	0.6	-0.34	0.07
Routine WBC differential large unstained cell number	3										chr3.50353748	50353748	1.83E-05	A	G	0.42	-0.29	0.07	Array SNPs captured the small LD, while GBS SNPs did not
	8	chr8.126176728	126176728	3.86E-06	T	A	0.32	0.34	0.07										GBS SNPs captured the small LD, while array SNPs did not
Retic parameters reticulocyte percent	1	chr1.152514594	152514594	1.88E-06	G	A	0.51	0.35	0.07		chr1.152834074	152834074	4.24E-06	A	G	0.49	-0.35	0.08
Retic parameters concentration of hemoglobin in reticulocytes	1										chr1.53330852	53330852	2.01E-05	A	G	0.51	0.29	0.07	GBS SNPs just below significance threshold
	7	chr7.102565307	102565307	2.70E-06	T	C	0.44	-0.31	0.07		chr7.99328376	99328376	1.48E-06	A	G	0.56	0.33	0.07
	8	chr8.128524048	128524048	2.62E-06	C	T	0.5	-0.29	0.06		chr8.128607127	128607127	1.56E-05	A	G	0.5	-0.27	0.06
	10	chr10.100656551	100656551	8.91E-06	C	T	0.69	0.3	0.07										GBS SNPs captured the small LD, while array SNPs did not
Retic parameters mean reticulocyte volume	7	chr7.104485236	104485236	3.78E-13	C	T	0.56	-0.45	0.06		chr7.101743401	101743401	3.54E-12	A	G	0.56	-0.43	0.06
	12	chr12.72761155	72761155	7.38E-06	G	A	0.35	-0.3	0.07		chr12.53108841	53108841	1.47E-05	A	C	0.49	-0.26	0.06
Routine CBC red blood cell count	1	chr1.148977286	148977286	3.42E-08	G	A	0.67	-0.41	0.07		chr1.138594975	138594975	7.85E-06	A	C	0.37	0.32	0.07
	18	chr18.61655044	61655044	5.81E-06	T	A	0.67	0.32	0.07										Array SNPs just below significance threshold
Retic parameters cell hemoglobin concentration mean	7	chr7.44655640	44655640	9.42E-07	T	C	0.3	-0.32	0.06										Array SNPs just below significance threshold
	7	chr7.104485236	104485236	3.19E-37	C	T	0.56	0.69	0.05		chr7.101743401	101743401	1.69E-37	A	G	0.56	0.69	0.05
Retic parameters concentration of hemoglobin in reticulocytes, repeat	1										chr1.53330852	53330852	1.55E-05	A	G	0.51	0.29	0.07	GBS SNPs just below significance threshold
	7	chr7.103760301	103760301	3.92E-13	C	T	0.44	-0.5	0.07		chr7.104581631	104581631	1.32E-13	C	T	0.56	0.51	0.07
	8	chr8.122001439	122001439	3.12E-06	A	G	0.35	-0.32	0.07		chr8.122456977	122456977	1.65E-05	C	T	0.32	-0.3	0.07
	10	chr10.99270837	99270837	2.24E-06	A	G	0.64	0.31	0.06										Array SNPs just below significance threshold
	17	chr17.35647605	35647605	3.52E-07	C	T	0.65	0.34	0.07		chr17.35708082	35708082	2.07E-06	C	T	0.64	0.33	0.07
Retic parameters cell hemoglobin distribution width	3	chr3.51353491	51353491	2.14E-06	G	A	0.59	-0.28	0.06		chr3.51202322	51202322	1.83E-05	G	T	0.41	0.27	0.06
	10	chr10.99307553	99307553	5.98E-06	C	A	0.63	0.29	0.06										GBS SNPs captured the small LD, while array SNPs did not
	17	chr17.37526413	37526413	2.61E-07	A	G	0.61	0.35	0.07		chr17.35708082	35708082	7.77E-07	C	T	0.64	0.35	0.07
Retic parameters red cell distribution width	10	chr10.66602511	66602511	1.81E-06	T	C	0.34	-0.36	0.08		chr10.67857982	67857982	1.12E-05	A	G	0.35	-0.33	0.07
Retic parameters hemoglobin distribution width	4	chr4.46085307	46085307	8.69E-06	A	T	0.64	-0.28	0.06										Array SNPs just below significance threshold
	4	chr4.59202210	59202210	7.28E-09	G	A	0.56	0.35	0.06		chr4.57891451	57891451	2.41E-08	A	G	0.57	0.36	0.06
	13	chr13.45281420	45281420	3.01E-06	T	C	0.26	-0.35	0.08										Array SNPs just below significance threshold
Retic parameters mean reticulocyte volume, repeat	3	chr3.28026799	28026799	1.05E-06	A	G	0.46	-0.28	0.06		chr3.28182377	28182377	8.66E-06	A	G	0.46	0.3	0.07
	7	chr7.104485236	104485236	4.32E-08	C	T	0.56	-0.37	0.07		chr7.104149022	104149022	2.16E-07	C	G	0.56	-0.35	0.07
	17	chr17.29056811	29056811	1.62E-06	C	T	0.52	0.32	0.07		chr17.28773124	28773124	1.78E-05	C	T	0.51	0.29	0.07
	17	chr17.42489082	42489082	1.10E-05	C	T	0.57	0.27	0.06										Array SNPs just below significance threshold
Retic parameters cell hemoglobin concentration mean, repeat	7	chr7.44630890	44630890	3.81E-07	G	A	0.31	-0.35	0.07		chr7.44560350	44560350	3.51E-06	A	C	0.63	0.3	0.06
	7	chr7.104170588	104170588	9.70E-26	A	G	0.43	-0.64	0.06		chr7.104581631	104581631	1.06E-24	C	T	0.56	0.63	0.06
	18	chr18.12096567	12096567	8.35E-06	C	T	0.59	-0.26	0.06		chr18.12188946	12188946	1.87E-05	C	T	0.41	0.26	0.06
Retic parameters concentration of hemoglobin in reticulocytes, repeat 2	7	chr7.102565307	102565307	1.70E-06	T	C	0.44	-0.32	0.07		chr7.99328376	99328376	2.37E-06	A	G	0.56	0.32	0.07
	8	chr8.128524048	128524048	3.30E-06	C	T	0.5	-0.28	0.06		chr8.128607127	128607127	1.74E-05	A	G	0.5	-0.27	0.06
	10	chr10.100656551	100656551	7.81E-06	C	T	0.69	0.3	0.07										Array SNPs just below significance threshold
Retic parameters cell hemoglobin distribution width, repeat	7	chr7.44844285	44844285	2.30E-07	G	T	0.26	-0.42	0.08		chr7.44991837	44991837	6.55E-08	C	T	0.74	0.44	0.08
	7	chr7.102596442	102596442	1.66E-06	A	G	0.57	0.35	0.07		chr7.99328376	99328376	3.32E-06	A	G	0.56	0.35	0.07
Retic parameters red blood cell distribution width, repeat	7	chr7.81458876	81458876	3.25E-06	C	T	0.49	0.36	0.08		chr7.81523675	81523675	6.72E-06	A	C	0.53	-0.34	0.07
Routine CBC hemoglobin	1	chr1.148977286	148977286	9.30E-06	G	A	0.67	-0.33	0.07										GBS SNPs captured the small LD, while array SNPs did not
	7	chr7.84360258	84360258	2.81E-07	A	G	0.58	-0.34	0.07		chr7.86607167	86607167	2.49E-06	A	C	0.56	-0.34	0.07
Retic parameters hemoglobin distribution width, repeat	7	chr7.44851630	44851630	3.60E-09	G	A	0.26	-0.44	0.07		chr7.44991837	44991837	9.20E-09	C	T	0.74	0.43	0.07
	7	chr7.84514575	84514575	6.00E-08	T	C	0.43	0.37	0.07		chr7.86607167	86607167	9.36E-07	A	C	0.56	-0.34	0.07
	7	chr7.103837099	103837099	1.95E-26	G	T	0.56	0.68	0.06		chr7.104149022	104149022	9.67E-25	C	G	0.56	0.67	0.06
Routine CBC hematocrit	1	chr1.41580321	41580321	3.74E-06	A	T	0.4	0.31	0.07										Array SNPs just below significance threshold
Routine CBC mean corpuscular hemoglobin	7	chr7.61710913	61710913	3.89E-06	G	C	0.31	0.33	0.07		chr7.61098677	61098677	1.17E-05	C	T	0.67	-0.32	0.07
Routine CBC mean corpuscular hemoglobin concentration	7	chr7.102306978	102306978	7.53E-10	A	T	0.4	-0.36	0.06		chr7.101743401	101743401	1.11E-08	A	G	0.56	0.35	0.06
Routine CBC cell hemoglobin concentration mean	2										chr2.116944990	116944990	5.70E-07	A	G	0.6	-0.27	0.05	GBS SNPs just below significance threshold
	2	chr2.128412068	128412068	1.86E-06	G	A	0.45	0.26	0.05										Array SNPs just below significance threshold
	7	chr7.104485236	104485236	2.98E-19	C	T	0.56	0.5	0.05		chr7.101743401	101743401	1.85E-19	A	G	0.56	0.5	0.05
	15										chr15.29893263	29893263	1.85E-05	A	G	0.25	-0.26	0.06	GBS SNPs just below significance threshold
Routine CBC red blood cell distribution width	7	chr7.102162058	102162058	4.78E-06	T	G	0.4	0.34	0.07										GBS SNPs captured the small LD, while array SNPs did not
	7	chr7.115540157	115540157	1.04E-05	T	G	0.47	-0.3	0.07		chr7.115144230	115144230	8.86E-06	A	G	0.52	-0.31	0.07
	10	chr10.66602511	66602511	2.19E-06	T	C	0.34	-0.36	0.07		chr10.67857982	67857982	3.50E-06	A	G	0.35	-0.35	0.07
Coat color, albino	7	chr7.87642045	87642045	5.00E-106	G	A	0.43	-0.58	0.02		chr7.87689885	87689885	3.76E-109	C	T	0.57	0.58	0.02
Coat color, agouti	2	chr2.154464466	154464466	9.43E-191	T	A	0.13	0.94	0.01		chr2.156541718	156541718	7.02E-19	C	T	0.54	-0.29	0.03
Open field, distance travelled in periphery	17	chr17.27130383	27130383	1.65E-06	G	A	0.46	-0.3	0.06		chr17.27427358	27427358	1.44E-05	A	G	0.48	-190	43.6
Fear conditioning, freezing to context day 2	2	chr2.40675713	40675713	3.16E-06	T	A	0.64	-0.33	0.07										GBS SNPs captured the small LD, while array SNPs did not
Heart weight	2	chr2.157384030	157384030	9.12E-06	C	A	0.53	0.29	0.06										Array SNPs just below significance threshold
Tibia length	1	chr1.77255381	77255381	1.39E-05	C	T	0.43	-0.37	0.08		chr1.79484856	79484856	1.43E-05	G	T	0.57	0.37	0.08
	1	chr1.84229885	84229885	3.14E-06	C	G	0.74	0.48	0.1										Array SNPs just below significance threshold
Gs weight	2	chr2.158315688	158315688	8.45E-06	G	C	0.53	0.29	0.06		chr2.158766733	158766733	1.79E-05	A	C	0.58	0.3	0.07
Heart weight per tibia length	2	chr2.154144099	154144099	1.25E-05	C	T	0.74	0.32	0.07										Array SNPs just below significance threshold
Liver iron	2	chr2.96320237	96320237	1.29E-05	A	G	0.5	0.27	0.06
	2	chr2.121930803	121930803	4.06E-12	C	A	0.43	-0.39	0.06		chr2.121791412	121791412	4.31E-10	A	C	0.55	0.37	0.06
	14	chr14.120621731	120621731	8.72E-06	A	T	0.75	-0.31	0.07
	15										chr15.92620186	92620186	1.68E-05	A	G	0.55	0.28	0.06
	18	chr18.62609019	62609019	4.08E-06
Liver iron, z score of measurement	2	chr2.96320237	96320237	8.52E-06	A	G	0.5	0.29	0.06										Array SNPs just below significance threshold
	2	chr2.121930803	121930803	4.17E-12	C	A	0.43	-0.42	0.06		chr2.121791412	121791412	5.41E-10	A	C	0.55	0.39	0.06
	14	chr14.120621731	120621731	1.11E-05	G	T	0.76	0.33	0.07										GBS SNPs captured the small LD, while array SNPs did not
	15										chr15.92620186	92620186	1.40E-05	A	G	0.55	0.3	0.07	GBS SNPs just below significance threshold
	18	chr18.62609019	62609019	2.90E-06	A	T	0.75	-0.33	0.07										GBS SNPs captured the small LD, while array SNPs did not
Spleen iron	2	chr2.95390277	95390277	4.96E-06	T	G	0.53	0.25	0.05		chr2.92214718	92214718	1.34E-05	A	G	0.41	0.29	0.06
	3	chr3.52749950	52749950	9.06E-06	C	T	0.51	0.26	0.06										Array SNPs just below significance threshold
	4	chr4.103791712	103791712	7.66E-06	G	A	0.55	-0.27	0.06										GBS SNPs captured the small LD, while array SNPs did not
	5	chr5.139374597	139374597	1.45E-07	A	C	0.5	0.28	0.05		chr5.139494734	139494734	2.24E-06	C	G	0.56	-0.29	0.06
	6	chr6.115489819	115489819	4.05E-08	A	G	0.33	0.34	0.06		chr6.116694949	116694949	5.97E-08	G	T	0.29	0.36	0.06
	10	chr10.110708296	110708296	1.15E-06	T	C	0.5	0.26	0.05		chr10.110883658	110883658	2.17E-06	A	G	0.49	-0.27	0.06
Spleen iron, z score of measurement	2	chr2.95390277	95390277	1.79E-06	T	G	0.53	0.28	0.06		chr2.92214718	92214718	5.23E-06	A	G	0.41	0.32	0.07
	3	chr3.52749950	52749950	1.31E-05	C	T	0.51	0.27	0.06										Array SNPs just below significance threshold
	4	chr4.103791712	103791712	1.24E-05	G	A	0.55	-0.29	0.07										GBS SNPs captured the small LD, while array SNPs did not
	5	chr5.139374597	139374597	1.70E-07	A	C	0.5	0.3	0.06		chr5.139494734	139494734	1.55E-06	C	G	0.56	-0.32	0.06
	6	chr6.116716073	116716073	4.43E-08	A	G	0.71	-0.37	0.07		chr6.116694949	116694949	8.20E-08	G	T	0.29	0.38	0.07
	10	chr10.110708296	110708296	1.00E-06	T	C	0.5	0.28	0.06		chr10.110883658	110883658	2.31E-06	A	G	0.49	-0.28	0.06
Locomotor test day 1, total distance travelled in 30min	19	chr19.21812298	21812298	3.98E-07	T	C	0.46	-0.36	0.07		chr19.21478738	21478738	6.40E-07	C	T	0.46	-0.35	0.07
Locomotor test day2, total distance travelled in 30min	8	chr8.17410225	17410225	5.65E-06	G	A	0.17	0.42	0.09		chr8.17159295	17159295	8.78E-06	A	G	0.83	-0.41	0.09
Quadriceps femoris muscle weight	1										chr1.22249888	22249888	1.29E-05	A	T	0.71	0.2	0.05	GBS SNPs just below significance threshold
	4										chr4.54609724	54609724	1.41E-05	C	T	0.55	0.19	0.04	GBS SNPs just below significance threshold
	6	chr6.81267890	81267890	3.28E-08	A	C	0.5	0.23	0.04		chr6.81465256	81465256	1.05E-07	A	G	0.5	0.22	0.04
	6	chr6.93488270	93488270	1.32E-06	C	T	0.53	-0.2	0.04										Array SNPs just below significance threshold
	8	chr8.128571869	128571869	4.15E-06	T	C	0.49	-0.19	0.04		chr8.128443469	128443469	7.74E-06	A	G	0.49	-0.19	0.04
	11	chr11.29486678	29486678	6.35E-07	G	A	0.6	0.21	0.04		chr11.29321273	29321273	5.69E-06	A	C	0.6	0.19	0.04
	14	chr14.77631724	77631724	7.58E-07	C	T	0.51	-0.21	0.04		chr14.77549688	77549688	1.76E-06	C	T	0.49	0.21	0.04
Tibialis anterior�muscle weight	11	chr11.29486678	29486678	4.24E-06	G	A	0.6	0.22	0.05		chr11.29321273	29321273	6.49E-06	A	C	0.6	0.22	0.05
Extensor digitorum longus muscle weight	4	chr4.63570198	63570198	6.58E-06	T	C	0.43	-0.21	0.04		chr4.54609724	54609724	1.54E-06	C	T	0.55	0.22	0.05
Gastrocnemius muscle weight	6	chr6.80767933	80767933	2.68E-06	A	G	0.48	0.19	0.04		chr6.80659015	80659015	1.69E-05	A	G	0.48	0.18	0.04
Soleus muslce weight	7	chr7.29791378	29791378	5.43E-06	G	C	0.62	0.26	0.06										Array SNPs just below significance threshold
	14										chr14.78040815	78040815	1.01E-05	G	T	0.51	0.23	0.05	GBS SNPs just below significance threshold
